# Supplementary material
Source: publisher figshare collection journal article supplement (https://sage.figshare.com/ndownloader/files/12891113)
Supplement: Supplementary file 1 [file 12891113]

| Components                          | Item | 3<br>Implemented                                                                                                    | 2<br>Partially Implemented                                                                                                                                                             | 1<br>Not Implemented                                                                                       |
|-------------------------------------|------|---------------------------------------------------------------------------------------------------------------------|----------------------------------------------------------------------------------------------------------------------------------------------------------------------------------------|------------------------------------------------------------------------------------------------------------|
| Identifying and Communicating Goals | 1    | The goals of the lesson <b>are clearly</b> communicated to the students.                                            | The goals of the lesson are <b>not clearly</b> communicated to the students.                                                                                                           | The goals of the lesson are <b>not</b> communicated to the students.                                       |
|                                     | 2    | The stated goal(s) is/are <b>specific</b> .                                                                         | The stated goal(s) is/are <b>broad or vague</b> .                                                                                                                                      | There is <b>no stated goal</b> .                                                                           |
|                                     | 3    | The teacher <b>clearly</b> explains the relevance of the stated goal to the students.                               | The teacher <b>tries to explain</b> the relevance of the stated goal to the students, but the <b>explanation is unclear or lacks detail</b> .                                          | The teacher <b>does not explain</b> the relevance of the stated goal to the students.                      |
| Alignment                           | 4    | Instruction is <b>completely aligned</b> to the stated or implied goal.                                             | Instruction is <b>partially or loosely aligned</b> to the stated or implied goal.                                                                                                      | Instruction is <b>not aligned</b> to the stated or implied goal.                                           |
|                                     | 5    | <b>All</b> of the examples or materials selected <b>are aligned</b> to the stated or implied goal.                  | <b>Some</b> of the examples or materials <b>are aligned</b> to the stated or implied goal; <b>OR</b> examples and materials are <b>somewhat aligned</b> to the stated or implied goal. | Examples or materials selected <b>are not aligned</b> to the stated or implied goal.                       |
|                                     | 6    | Examples or materials selected <b>are aligned</b> to the instructional level of <b>most or all</b> of the students. | Examples or materials selected <b>are aligned</b> to the instructional level of <b>some</b> of the students.                                                                           | Examples or materials selected <b>are not aligned</b> to the instructional level of <b>most students</b> . |

| Components          | Item | 3<br>Implemented                                                                                                             | 2<br>Partially Implemented                                                                                                             | 1<br>Not Implemented                                                                                                    |
|---------------------|------|------------------------------------------------------------------------------------------------------------------------------|----------------------------------------------------------------------------------------------------------------------------------------|-------------------------------------------------------------------------------------------------------------------------|
| Teaching Procedures | 7    | The teacher <b>effectively</b> reviews prior skills and/or engages background knowledge <b>before beginning</b> instruction. | The teacher reviews prior skills and/or engages background knowledge <b>before beginning</b> instruction, <b>but not effectively</b> . | The teacher <b>does not</b> review prior skills and/or engage background knowledge <b>before beginning</b> instruction. |
|                     | 8    | The teacher <b>provides clear</b> demonstrations of proficient performance.                                                  | The teacher <b>does not provide clear</b> demonstrations of proficient performance.                                                    | The teacher <b>does not provide any</b> demonstrations of proficient performance.                                       |
|                     | 9    | The teacher <b>provides an adequate number</b> of demonstrations given the nature and complexity of the skill or task.       | The teacher <b>does not provide an adequate number</b> of demonstrations given the nature and complexity of the skill or task.         | The teacher <b>does not provide</b> demonstrations.                                                                     |
|                     | 10   | The teacher uses language that is <b>clear, precise, and accurate</b> throughout the lesson.                                 | The teacher uses language that is <b>not always clear, precise, and accurate</b> .                                                     | The teacher uses language that is <b>confusing, unclear, imprecise, or inaccurate</b> throughout the lesson.            |
|                     | 11   | Scaffolding is provided <b>when it is needed</b> to facilitate learning.                                                     | <b>Some</b> scaffolding is provided, but <b>more is needed</b> to facilitate learning.                                                 | Scaffolding is <b>needed</b> , but <b>no</b> scaffolding is provided <b>to facilitate learning</b> .                    |

| Components      | Item | 3<br>Implemented                                                                                                                                           | 2<br>Partially Implemented                                                                                                                | 1<br>Not Implemented                                                                                                                                                      |
|-----------------|------|------------------------------------------------------------------------------------------------------------------------------------------------------------|-------------------------------------------------------------------------------------------------------------------------------------------|---------------------------------------------------------------------------------------------------------------------------------------------------------------------------|
|                 | 12   | Complex skills or strategies <b>are broken down</b> into logical instructional units to address cognitive overload, processing demands, or working memory. | Complex skills or strategies <b>are not effectively broken down</b> to address cognitive overload, processing demands, or working memory. | Complex skills and strategies <b>are not broken down as needed</b> into logical instructional units to address cognitive overload, processing demands, or working memory. |
|                 | 13   | The teacher <b>systematically withdraws</b> support as the students move toward independent use of the skills.                                             | The teacher withdraws support, but <b>it is not withdrawn systematically.</b>                                                             | The teacher <b>does not withdraw</b> support; <b>OR</b> the teacher provides very limited support and then <b>abruptly withdraws</b> it.                                  |
| Guided Practice | 14   | Guided practice is <b>focused</b> on the application of skills or strategies related to the stated or implied goal.                                        | Guided practice is <b>somewhat focused</b> on the application of skills or strategies related to the stated or implied goal.              | Guided practice is <b>not focused</b> on the application of skills or strategies related to the stated or implied goal.                                                   |
|                 | 15   | The teacher <b>consistently prompts</b> students to apply skills or strategies throughout guided practice.                                                 | The teacher prompts students to apply skills or strategies, but <b>not consistently OR not effectively</b> throughout guided practice.    | The teacher <b>does not prompt</b> students to apply skills or strategies throughout guided practice.                                                                     |
| Pacing          | 16   | The teacher maintains an <b>appropriate</b> pace <b>throughout the lesson.</b>                                                                             | The teacher maintains an <b>appropriate</b> pace during <b>some of the lesson.</b>                                                        | The teacher maintains an <b>inappropriate</b> pace <b>throughout the lesson.</b>                                                                                          |

Moylan, L. A., Johnson, E. S., Crawford, A. R., & Zheng, Y. (2017). *Explicit Instruction Rubric*. Recognizing Effective Special Education Teachers. Boise State University, Boise: ID.

| Components | Item | 3<br>Implemented                                                                                        | 2<br>Partially Implemented                                                                                                                                                      | 1<br>Not Implemented                                                                                   |
|------------|------|---------------------------------------------------------------------------------------------------------|---------------------------------------------------------------------------------------------------------------------------------------------------------------------------------|--------------------------------------------------------------------------------------------------------|
|            | 17   | The teacher <b>allows adequate</b> time for students to think or respond <b>throughout</b> the lesson.  | The teacher <b>sometimes allows adequate</b> time for students to think or respond but <b>inconsistently throughout</b> the lesson.                                             | The teacher <b>never allows</b> adequate time to students to think or respond.                         |
|            | 18   | The teacher <b>maintains focus</b> on the stated or implied goal <b>throughout</b> the lesson.          | The teacher <b>inconsistently focuses</b> on the stated or implied goal.                                                                                                        | The teacher <b>does not focus</b> on the stated or implied goal.                                       |
| Engagement | 19   | The teacher <b>provides frequent</b> opportunities for students to engage or respond during the lesson. | The teacher <b>provides limited</b> opportunities for students to engage or respond during the lesson.                                                                          | The teacher <b>does not provide</b> opportunities for students to engage or respond during the lesson. |
|            | 20   | There are <b>structured and predictable</b> instructional routines throughout the lesson.               | Instructional routines are <b>not consistently</b> applied throughout the lesson.                                                                                               | There is <b>no</b> instructional routine.                                                              |
|            | 21   | The teacher <b>monitors</b> students to ensure they remain engaged.                                     | The teacher <b>monitors inconsistently</b> throughout the lesson; <b>OR</b> the teacher <b>does not consistently</b> monitor <b>all students</b> to ensure they remain engaged. | The teacher <b>does not</b> monitor students to ensure they remain engaged.                            |

| Components              | Item | 3<br>Implemented                                                                                     | 2<br>Partially Implemented                                                                                                                                        | 1<br>Not Implemented                                                                                         |
|-------------------------|------|------------------------------------------------------------------------------------------------------|-------------------------------------------------------------------------------------------------------------------------------------------------------------------|--------------------------------------------------------------------------------------------------------------|
| Monitoring and Feedback | 22   | The teacher <b>consistently</b> checks for understanding <b>throughout the lesson</b> .              | The teacher only checks <b>some students</b> for understanding; <b>OR</b> the teacher does <b>not consistently</b> check for understanding throughout the lesson. | The teacher does <b>no or very minimal</b> checking for understanding.                                       |
|                         | 23   | The teacher provides timely feedback <b>throughout the lesson</b> .                                  | The teacher <b>occasionally</b> provides timely feedback.                                                                                                         | The teacher <b>does not</b> provide feedback; <b>OR</b> it is <b>not timely</b> .                            |
|                         | 24   | Feedback is specific and informative <b>throughout</b> the lesson.                                   | Feedback is <b>not consistently</b> specific and informative throughout the lesson.                                                                               | There is <b>no</b> feedback; <b>OR</b> it is <b>not at all</b> specific and informative.                     |
|                         | 25   | The teacher <b>makes</b> adjustments to instruction <b>as needed</b> based on the student responses. | The teacher <b>makes some</b> adjustments to instruction as needed based on the student responses, <b>but more adjustments are needed</b> .                       | The teacher <b>does not make</b> adjustments to instruction <b>as needed</b> based on the student responses. |
